# Supplementary material for: Telomere Dysfunction Activates p53 and Represses HNF4α Expression Leading to Impaired Human Hepatocyte Development and Function
Source: PubMed Central journal article supplement — Hepatology. 2020 Aug 26;72(4):1412–29. doi: 10.1002/hep.31414 (PMC7693115; doi:10.1002/hep.31414), 2020-08-26
Supplement: HEP-72-1412-s001.pdf [file HEP-72-1412-s001.pdf]

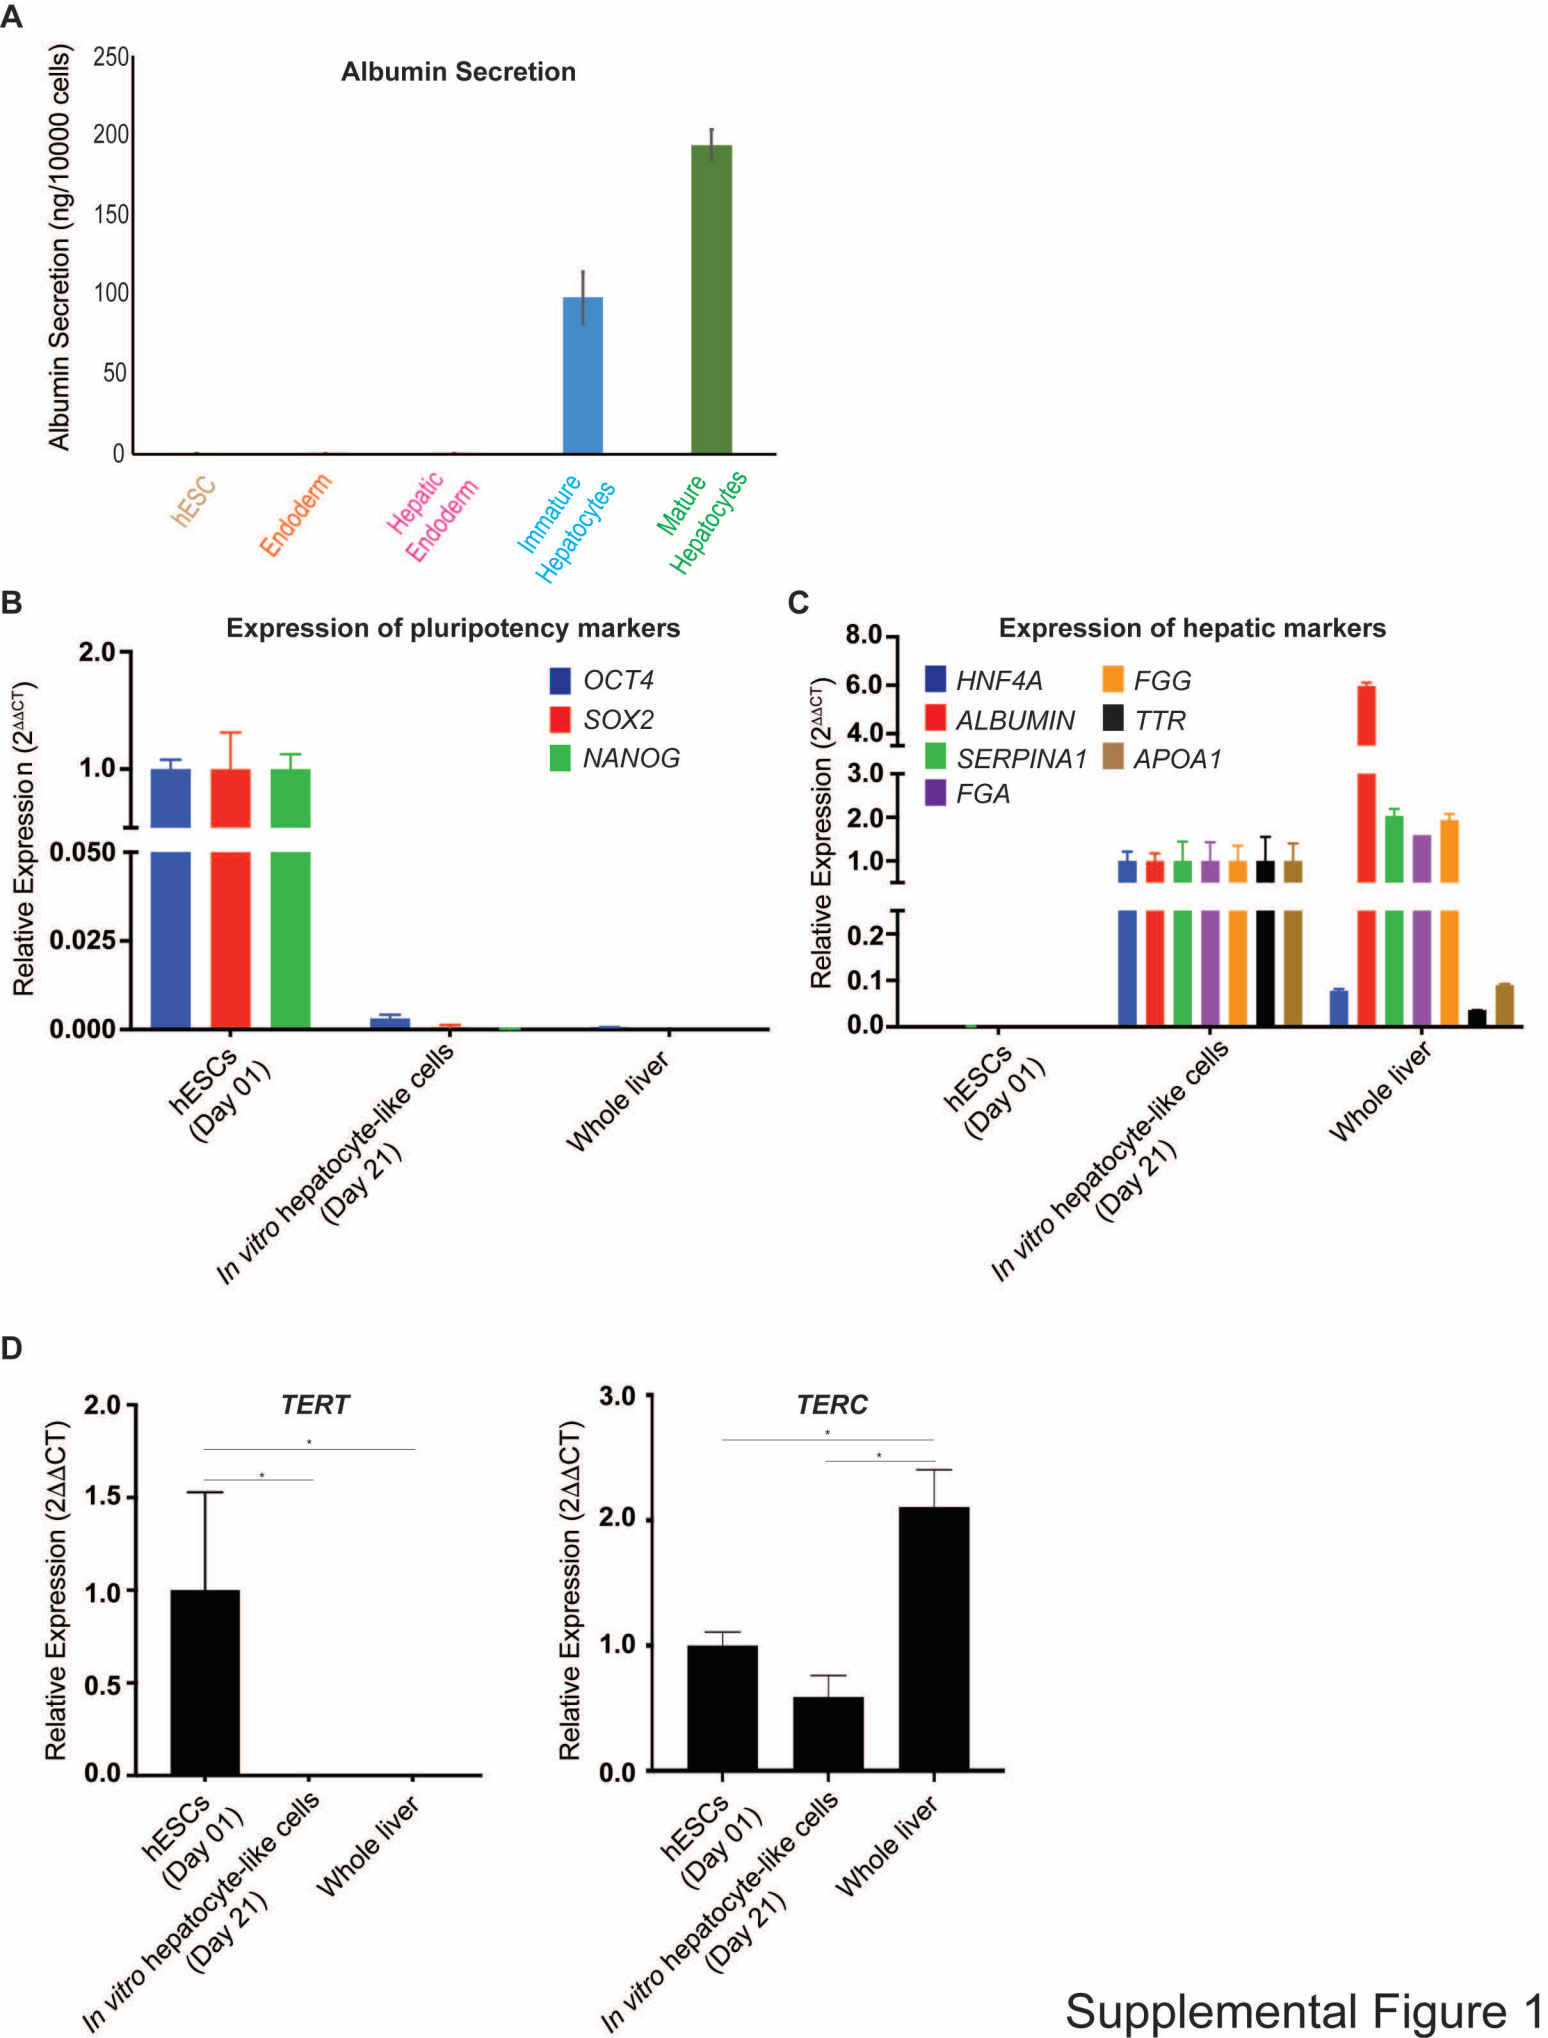

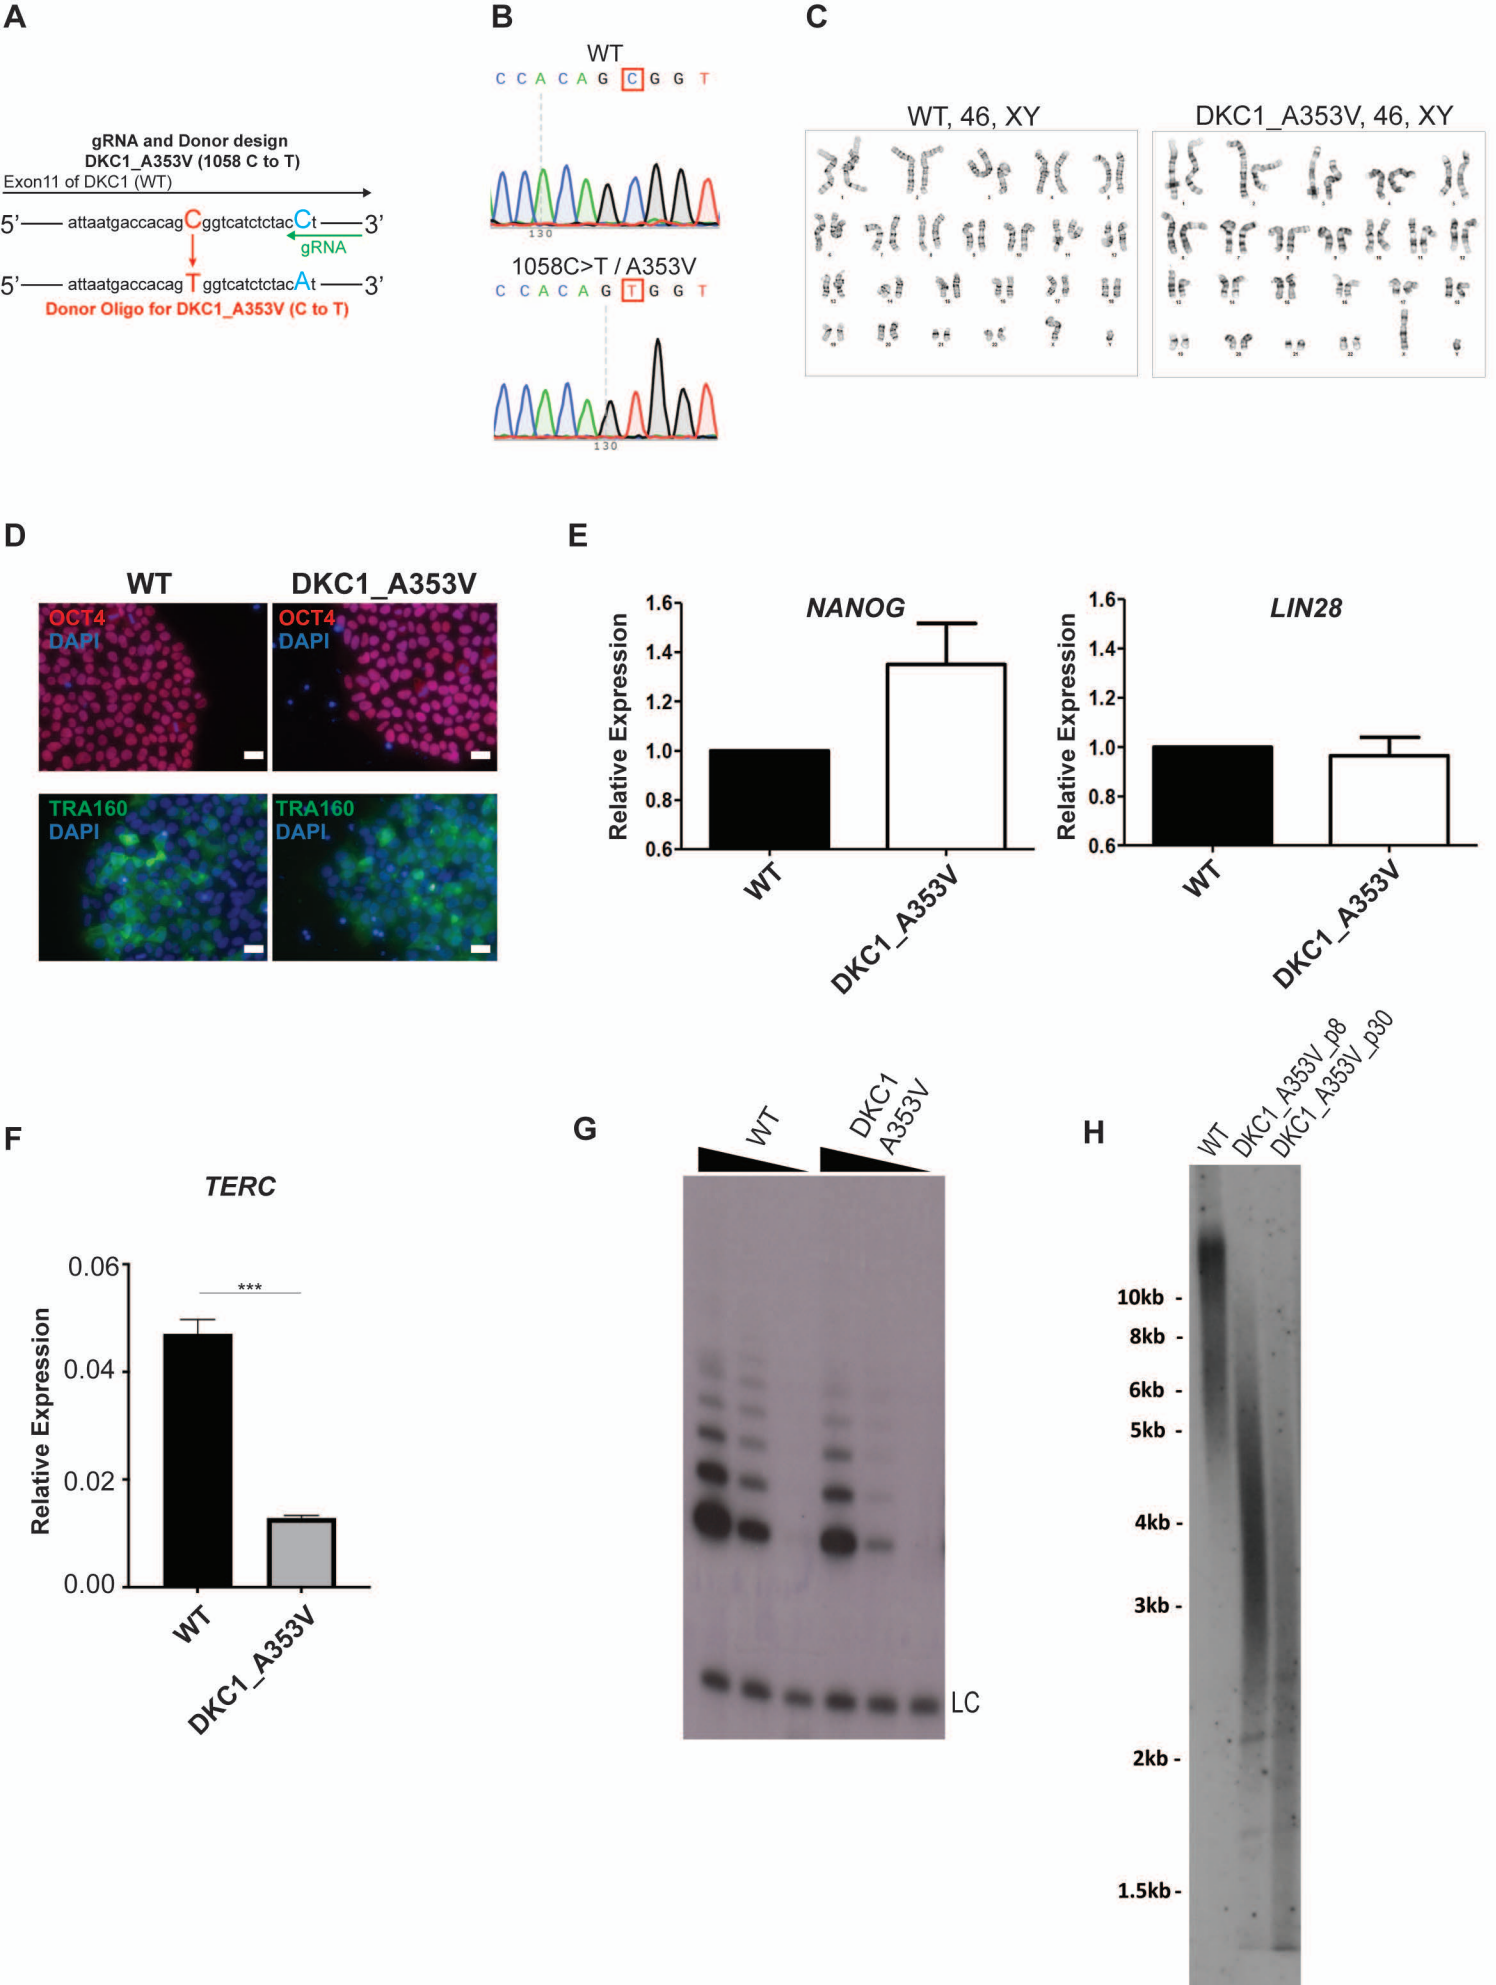

Supplemental Figure 2

**A**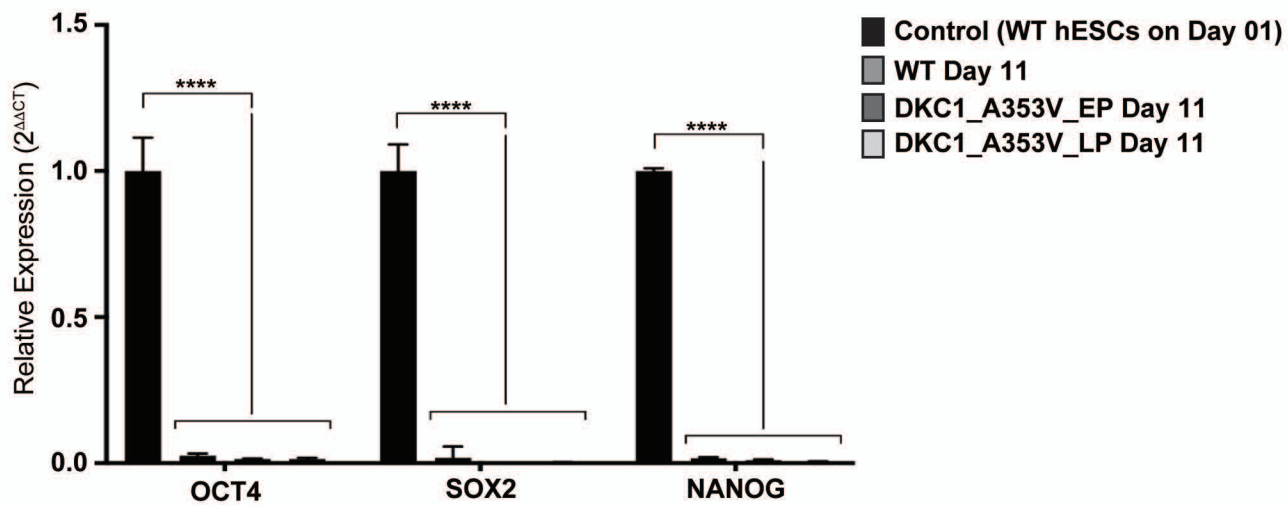**B**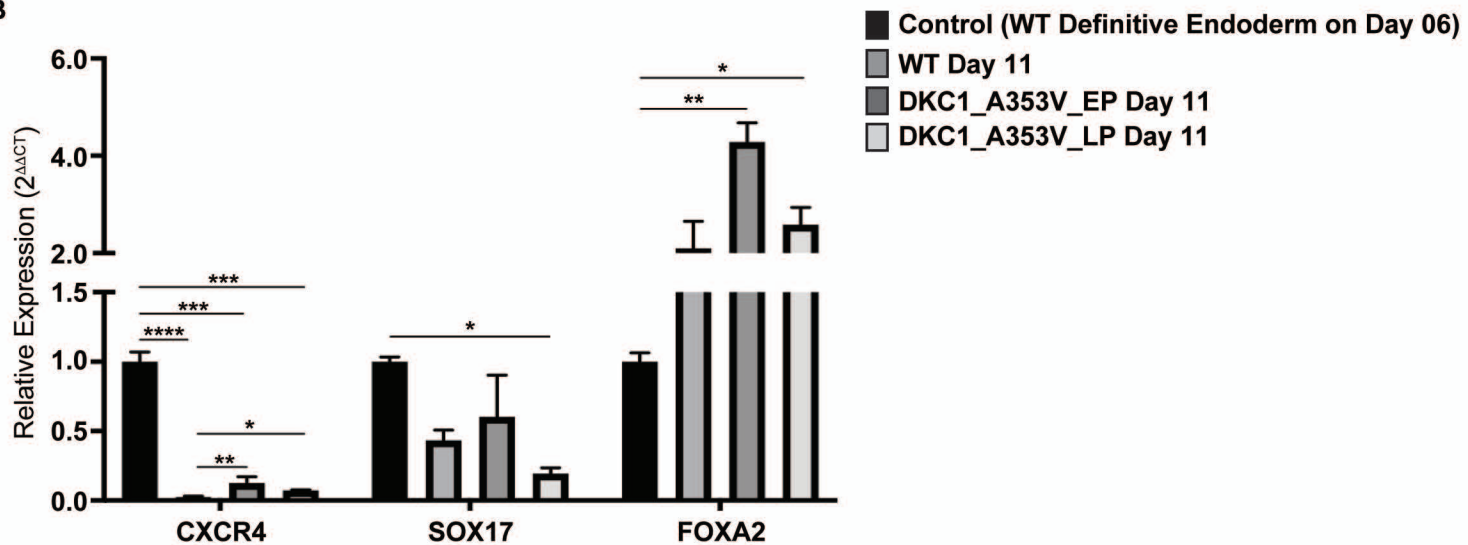

**A**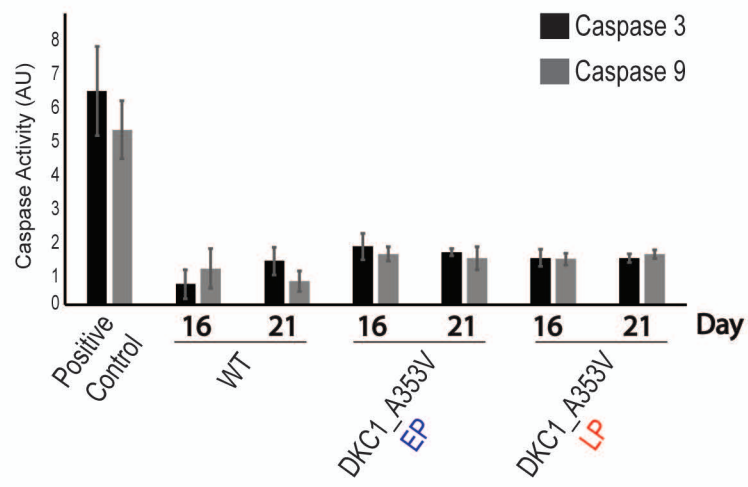**B**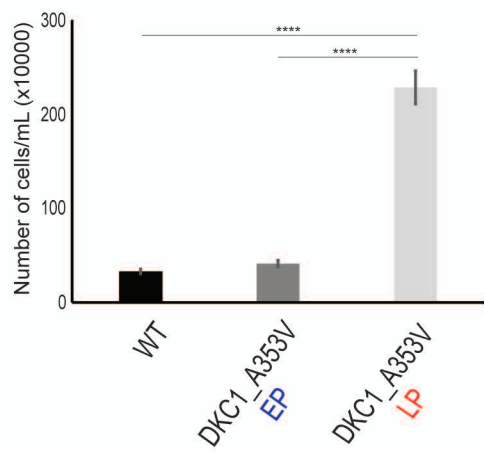

**A**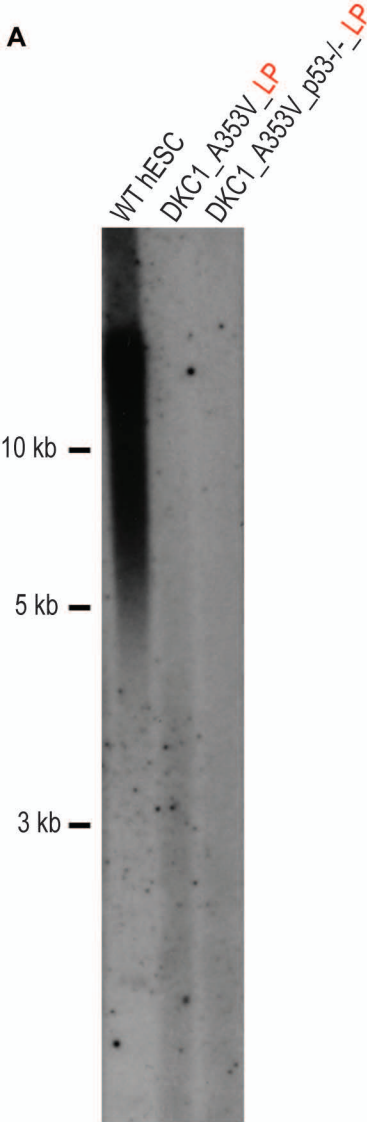**B**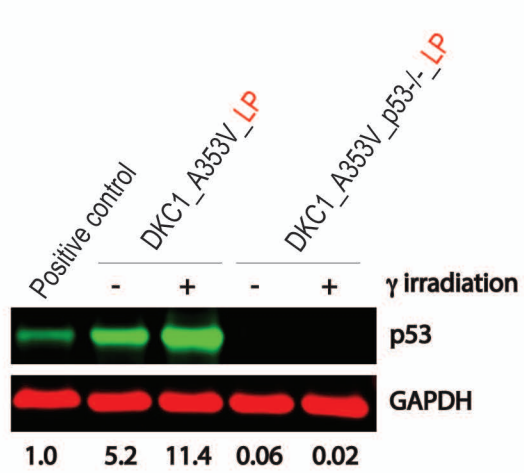**C**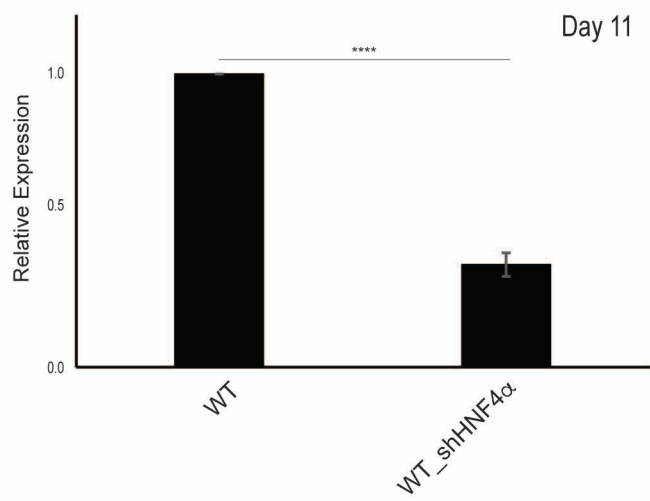

## SUPPLEMENTAL FIGURE LEGENDS

**Supplemental Figure 1: Characterization of hepatocyte differentiation *in vitro*.** (A) Quantification of albumin secretion (by ELISA) at different stages of hepatocyte development in WT cells. hESC (Day 01); Endoderm (Day 06); Hepatic Endoderm (Day 11); Immature Hepatocytes (Day 16); Mature Hepatocytes (Day 21). (B) Relative gene expression analysis by real-time quantitative PCR of different pluripotency markers (*OCT4*, *SOX2* and *NANOG*) in hESCs (Day 01 of differentiation protocol), *in vitro* derived hepatocyte-like cells (Day 21 of differentiation protocol), and RNA extracted from human whole liver samples. (C) Relative gene expression analysis by real-time quantitative PCR of different hepatic markers (*HNF4 $\alpha$* , *ALBUMIN*, *SERPINA1*, *FGA*, *FGG*, *TTR* and *APOA1*) on hESCs (Day 01 of differentiation protocol), *in vitro* derived hepatocyte-like cells (Day 21 of differentiation protocol), and RNA extracted from human whole liver samples. (D) Relative gene expression analysis of *TERT* and *TERC* in hESCs (Day 01 of differentiation protocol), *in vitro* derived hepatocyte-like cells (Day 21 of differentiation protocol), and RNA extracted from human whole liver samples. n=3, mean  $\pm$  SEM,  $p \leq 0.05$ . Statistical analysis was performed using one-way ANOVA followed by Tukey's post hoc test.

**Supplemental Figure 2: Construction of telomerase mutant DKC1\_A353V hESCs.** (A) Strategy for introduction of disease-specific mutations in DKC1. Guide RNAs (gRNAs) targeting Exon 11 (DKC1) were used with in combination with specific ssDNA donor oligo templates for introduction of DKC1 (A353V; C>T). In blue, silent mutations introduced to facilitate CRISPR/Cas9 mediated genome modification. (B) DNA sequencing confirms correct C>T

modification in DKC1\_A353V hESCs. **(C)** G-band analysis in wild-type and DKC1\_A353V hESCs. No chromosomal abnormalities were detected. **(D)** Immunofluorescence analysis confirming normal expression of the pluripotency markers OCT4 and TRA160 in DKC1\_A353V hESCs. Scale Bars represent 20  $\mu$ M. **(E)** Real-time quantitative PCR analysis of different pluripotency markers in WT and DKC1\_A353V hESCs. **(F)** Real-time quantitative PCR analysis of *TERC* in WT and DKC1\_A353V hESCs. **(G)** Telomerase activity by TRAP in WT and DKC1\_A353V mutants. Range of concentrations represent four-fold serial dilutions. LC: loading control. **(H)** Telomere length analysis by Telomere Restriction Fragment (TRF) of wild-type and DKC1\_A353V hESCs at different cell passages, demonstrating progressive telomere shortening in mutant cells. Molecular weight (in kb) is shown.  $n=3$ , mean  $\pm$  SEM, \*\*\* $p\leq 0.001$ . Statistical analysis was performed using unpaired t-test.

**Supplemental Figure 3: Gene expression analysis during hepatic endoderm specification.** **(A)** Real-time quantitative PCR analysis of different pluripotency markers (*OCT4*, *SOX2* and *NANOG*) from WT, DKC1\_A353V\_EP and DKC1\_A353V\_LP cells on Day 11 of differentiation (hepatic endoderm stage). Expression is shown in relation to WT hESCs on Day 01 of differentiation (hESC stage). **(B)** Real-time quantitative PCR analysis of endoderm markers (*CXCR4* and *SOX17*) and *FOXA2* from WT, DKC1\_A353V\_EP and DKC1\_A353V\_LP cells on Day 11 of differentiation (hepatic endoderm stage). Expression is shown in relation to WT hESCs on Day 06 of differentiation (definitive endoderm stage).  $n=3$ , mean  $\pm$  SEM, \* $p\leq 0.05$ ; \*\* $p\leq 0.01$ ; \*\*\* $p\leq 0.001$ ; \*\*\*\* $p\leq 0.0001$ . Statistical analysis was performed using one-way ANOVA followed by Tukey's post hoc test for each gene.

**Supplemental Figure 4: Analysis of cellular viability during hepatic differentiation. (A)**

Quantification of caspases 3 and 9 activation in early passage and late passage cells after 21 days of differentiation. Positive control: Ultraviolet Light irradiated (UV; 30J/m<sup>2</sup>) WT hESCs. **(B)** Total number of cells after hepatic differentiation of WT and DKC1\_A353V hESCs. Cells were collected on Day 21 and figure shows total number of cells found in each population (total numbers quantified by cell counter).  $n=3$ , mean  $\pm$  SEM, \* $p\leq 0.05$ ; \*\* $p\leq 0.0025$ ; \*\*\* $p\leq 0.001$ ; \*\*\*\* $p\leq 0.0001$ . Statistical analysis was performed using one-way ANOVA followed by Tukey's post hoc test.

**Supplemental Figure 5: Generation of DKC1\_A353V\_p53<sup>-/-</sup> and WT\_shHNF4 $\alpha$  hESCs. (A)**

Telomere length analysis by Telomere Restriction Fragment (TRF) from WT and isogenic, CRISPR/Cas9 engineered, DKC1\_A353V and DKC1\_A353V\_p53<sup>-/-</sup> hESCs. Telomeres in DKC1\_A353V and DKC1\_A353V\_p53<sup>-/-</sup> hESCs are significantly shorter, as these cells reduced telomerase activity. Molecular weight (in kb) is shown. **(B)** Representative immunoblot analysis of p53 expression in DKC1\_A353V and DKC1\_A353V\_p53<sup>-/-</sup> hESCs. Samples were irradiated (+) or not (-) with 5Gy of gamma irradiation. Positive control: gamma irradiated (5Gy) WT hESCs. GAPDH is shown as loading control. Relative expression levels are indicated. **(C)** Efficient silencing of *HNF4 $\alpha$*  expression in WT\_sh HNF4 $\alpha$  cells at the hepatic endoderm stage (Day 11).  $n=3$ , mean  $\pm$  SEM, \*\*\*\* $p\leq 0.0001$ . Statistical analysis was performed using unpaired t-test.



**Sup. Table 1: Primer sequences used in this manuscript.**

| <b>Primer</b>                             | <b>Forward sequence</b>  | <b>Reverse sequence</b>    |
|-------------------------------------------|--------------------------|----------------------------|
| <i><math>\beta</math>-actin</i>           | TTCCTTCCTGGGCATGGAGT     | AATGCCAGGGTACATGGTGG       |
| <i>18S rRNA</i>                           | GCTTAATTTGACTCAACACGGGA  | AGCTATCAATCTGTCAATCCTGTC   |
| <i><math>\beta</math>-2-microglobulin</i> | TTCAGGTTTACTCACGTCATCC   | AGACAAGTCTGAATGCTCCAC      |
| <i>TERC</i>                               | CGCTGTTTTTCTCGCTGACT     | GCTCTAGAATGAACGGTGGAA      |
| <i>TERT</i>                               | CGAAAACCTTCCTCAGGACCC    | GGCCGGCATCTGAACAAAAG       |
| <i>OCT4</i>                               | GACAGGGGGAGGGGAGGAGCTAGG | CTCCCTCCAACCAGTTGCCCAAAC   |
| <i>SOX2</i>                               | TTCACATGTCCCAGCACTACCAGA | TCACATGTGTGAGAGGGGCAGTGTGC |
| <i>NANOG</i>                              | TGAACCTCAGCTACAAACAG     | TGGTGGTAGGAAGAGTAAAG       |
| <i>CXCR4</i>                              | GGCAGCAGGTAGCAAAGTGA     | TGAAGTGTATATACTGATCCCCTCC  |
| <i>SOX17</i>                              | CTCCGGTGTGAATCTCCCC      | CACGTCAGGATAGTTGCAGTAAT    |
| <i>FOXA2</i>                              | GGAGCAGCTACTATGCAGAGC    | CGTGTTTCATGCCGTTTCATCC     |
| <i>HNF4<math>\alpha</math></i>            | ATAGCTTGACCTTCGAGTGC     | TGGACAAAGACAAGAGGAACC      |
| <i>AFP</i>                                | GGCAGCCACAGCAGC ACTT     | TGCAGCGCTACACCCTGAGC       |
| <i>FGA</i>                                | CAGCCCCACCCTTAGAAAAG     | CTCCTTCAGCTAGAAAAGTCACC    |
| <i>FGG</i>                                | CAAAGACACGGTGCAAATCC     | TTCCAGACCCATCGATTTTAC      |
| <i>ALBUMIN</i>                            | TGGCACAATGAAGTGGGTAA     | CTGAGCAAAGGCAATCAACA       |
| <i>CYP1A1</i>                             | CCCAACCCTTCCTGAATG       | TTCTTCTCCTGACAGTGCTCAATC   |
| <i>SERPINA1</i>                           | AGCCAGGGAGACAGGGA        | CTTAAATACGGACGAGGACAGG     |
| <i>TTR</i>                                | CAGGTTTGCAGTCAGATTGG     | CCATCCTGCCAAGAATGAGT       |
| <i>APOA1</i>                              | CTTTGAGCACATCCACGTACA    | GCCGTGCTCTTCCTGAC          |
